# Supplementary material for: Modulating the electronic configuration of Co species in MOF/MXene nanosheet derived Co-based mixed spinel oxides for an efficient oxygen evolution reaction
Source: Royal Society of Chemistry journal article supplement (doi:10.1039/d2qi02098j), 2022-11-16
Supplement: d2qi02098j1.pdf [file d2qi02098j1.pdf]

## *Electronic Supplementary Information*

### **Modulating the electronic configuration of Co species in MOF/MXene nanosheets derived Co-based mixed spinel oxides for efficient oxygen evolution reaction**

Chuming Xu,<sup>#a</sup> Xifeng Yang,<sup>#a</sup> Shuang Li,<sup>\*a,b</sup> Keke Li,<sup>a</sup> Benjun Xi,<sup>b</sup> Qing-Wen Han,<sup>b</sup>  
Ya-pan Wu,<sup>a,b</sup> Xue-Qian Wu,<sup>a,b</sup> Ru-an Chi<sup>b</sup> and Dong-sheng Li<sup>\*a,b</sup>

<sup>a</sup>College of Materials and Chemical Engineering, Key Laboratory of Inorganic Nonmetallic Crystalline and Energy Conversion Materials, China Three Gorges University, Yichang, 443002, P. R. China

<sup>b</sup>Hubei Three Gorges Laboratory, Yichang, Hubei 443007, P. R. China

\*Corresponding Author.

E-mail address: [lishmail@126.com](mailto:lishmail@126.com); [lidongsheng1@126.com](mailto:lidongsheng1@126.com).

<sup>#</sup>These authors contributed equally to this work.

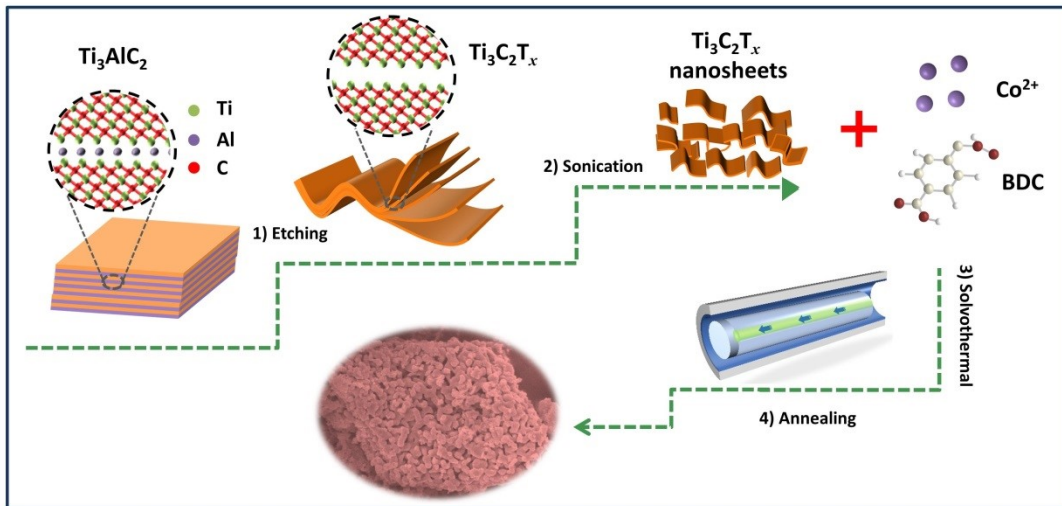

**Fig. S1.** The preparation process of the Co-based mixed spinel oxides.

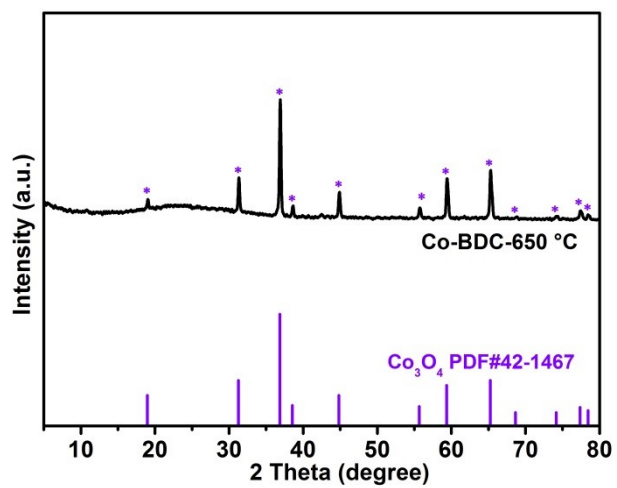

**Fig. S2.** XRD pattern of Co-BDC annealed at 650°C.

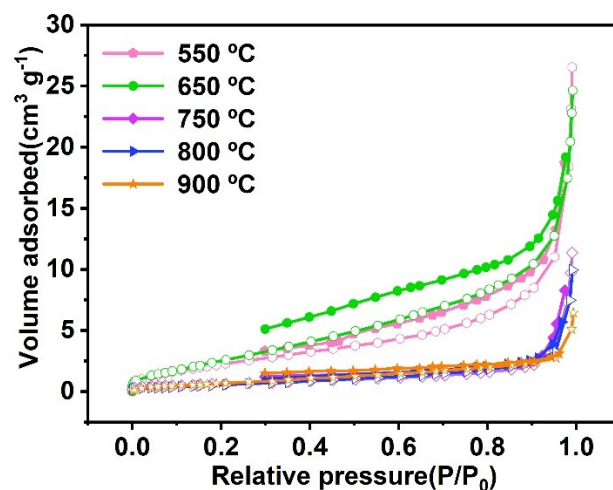

**Fig. S3.** Nitrogen adsorption and desorption curves of the  $\text{CoTiO}_x\text{-T}$ . All samples show type-IV isotherms with a very distinct hysteresis loop of typical H3. The BET surface area of the  $\text{CoTiO}_x\text{-650}$  is  $12.3 \text{ m}^2 \text{ g}^{-1}$ , which is larger than that of  $\text{CoTiO}_x\text{-550}$  ( $9.5 \text{ m}^2 \text{ g}^{-1}$ ),  $\text{CoTiO}_x\text{-750}$  ( $2.3 \text{ m}^2 \text{ g}^{-1}$ ),  $\text{CoTiO}_x\text{-800}$  ( $2.5 \text{ m}^2 \text{ g}^{-1}$ ),  $\text{CoTiO}_x\text{-900}$  ( $3.1 \text{ m}^2 \text{ g}^{-1}$ ).

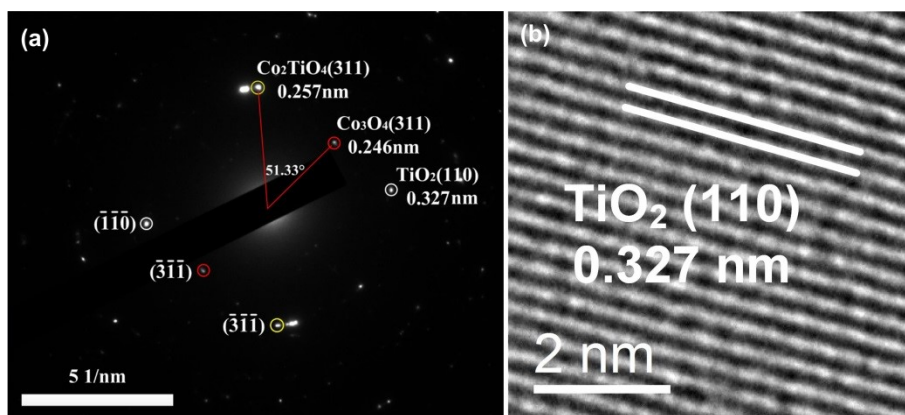

**Fig. S4.** (a) The selected area electron diffraction (SAED) image and (b) HRTEM image of  $\text{CoTiO}_x$ -650.

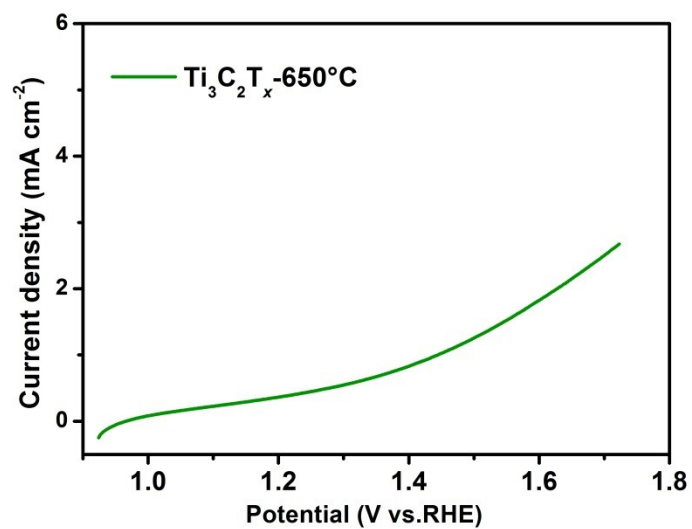

**Fig. S5.** The polarization curve of OER on  $\text{Ti}_3\text{C}_2\text{T}_x$  annealed at  $650^\circ\text{C}$ . It can be seen that the annealed product  $\text{TiO}_2$  has almost no OER activity.

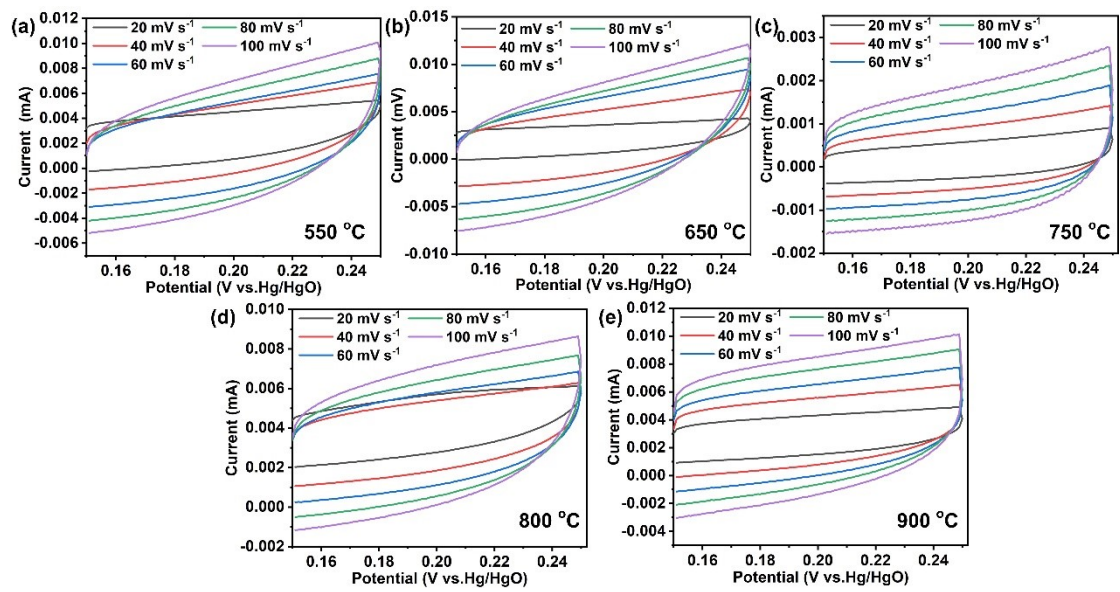

**Fig. S6.** Cyclic voltammetric curves of different samples.

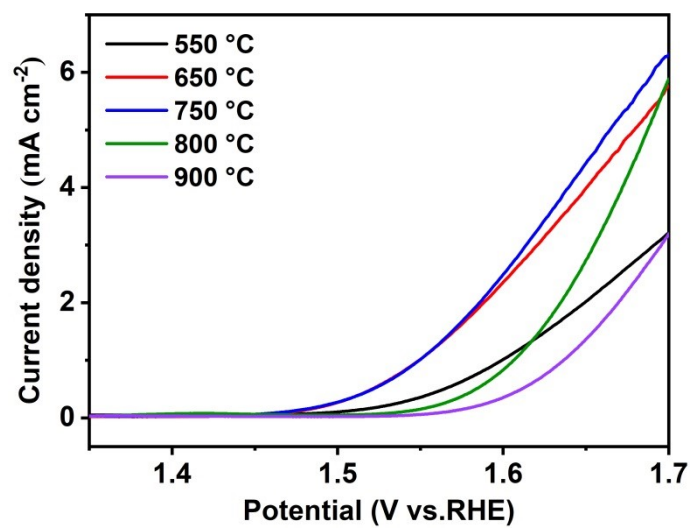

**Fig. S7.**  $C_{dl}$ -normalized polarization curves for CoTiO<sub>x</sub>-T catalysts.



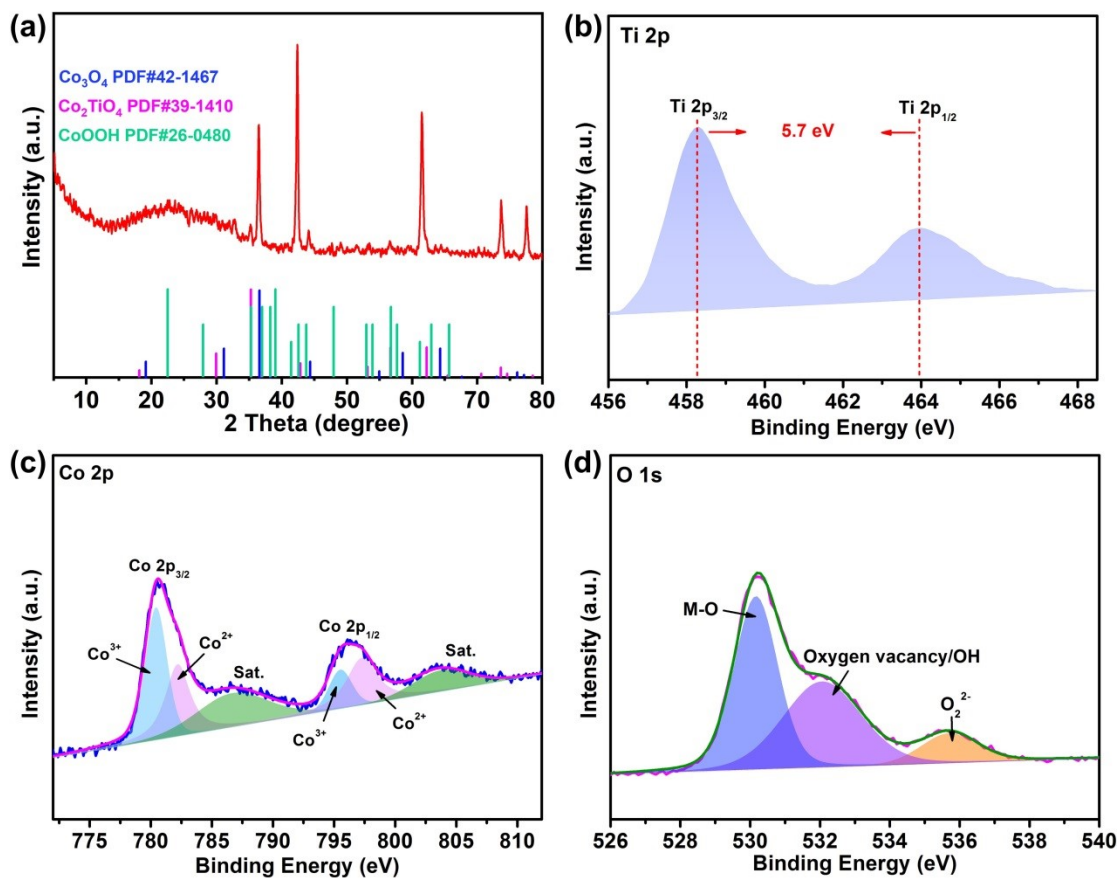

**Fig. S8.** The XRD and XPS of CoTiO<sub>x</sub>-650 after stability test.

**Table S1. Comparison of the overpotential at 10 mA cm<sup>-2</sup> of present work and the other OER catalysts in a three-electrode system**

| Catalyst                                                       | Overpotential<br>10 mA cm <sup>-2</sup><br>(mV) | Electrolyte   | Support   | Reference                                                   |
|----------------------------------------------------------------|-------------------------------------------------|---------------|-----------|-------------------------------------------------------------|
| <b>CoTiO<sub>x</sub>-650</b>                                   | <b>260</b>                                      | <b>1M KOH</b> | <b>NF</b> | This work                                                   |
|                                                                | <b>280</b>                                      | <b>1M KOH</b> | <b>GC</b> |                                                             |
| NNU-23 (Fe <sub>2</sub> Ni-MOF)                                | 365                                             | 0.1m KOH      | CC        | Angew. Chem. Int. Ed.,<br>2018, 57, 9660                    |
| Co-BDC nanosheets                                              | 371                                             | 1M KOH        | GC        | Nat. Energy, 2016, 1, 16184                                 |
| NiO/CoN PINWs                                                  | 300                                             | 0.1M KOH      | CC        | ACS Nano, 2017, 11, 2275                                    |
| Ni-MOF@Fe-MOF powder                                           | 265                                             | 1M KOH        | GC        | Adv. Funct. Mater., 2018,<br>28, 1801554                    |
| FeNi-BTC                                                       | 270                                             | 0.1 M KOH     | NF        | ACS Appl. Mater.<br>Interfaces, 2016, 8 , 16736             |
| Co-PB/Pt                                                       | 300                                             | 1M KOH        | GC        | ACS Sustainable Chem.<br>Eng., 2017, 5, 11577               |
| Co(TCNQ) <sub>2</sub>                                          | 310                                             | 1M KOH        | Co foil   | Chem. Eur. J., 2018, 24,<br>2075                            |
| TiC <sub>2</sub> TX-CoBDC                                      | 410                                             | 0.1M KOH      | GC        | ACS Nano, 2017, 11, 5800                                    |
| Fe:2D-Co-NS                                                    | 282                                             | 0.1M KOH      | GC        | Angew. Chem. Int. Ed.,<br>2018, 57, 4632                    |
| Co <sub>3</sub> O <sub>4</sub> -based catalysts                | 260                                             | 1M KOH        | CC        | Angew. Chem. Int. Ed.,<br>2020, 59, 6929-6935               |
| Co <sub>3</sub> O <sub>4</sub> -Ag@B                           | 270                                             | 1M KOH        | GC        | Applied Catalysis B:<br>Environmental, 2021, 298,<br>120529 |
| Co <sub>3</sub> O <sub>4</sub> /Ti <sub>3</sub> C <sub>2</sub> | 300                                             | 1M KOH        | GC        | Sci. Bull., 2020, 65, 460                                   |
| Ni-MOF@Fe-MOF powder                                           | 265                                             | 1M KOH        | GC        | Adv. Funct. Mater., 2018,<br>28, 1801554                    |
| n-Co <sub>3</sub> O <sub>4</sub>                               | 380                                             | 1M KOH        | GC        | ACS Appl. Energy Mater.,<br>2020, 3, 5439                   |
| Fe-Co-O nanosheets                                             | 260                                             | 1M KOH        | GC        | Small, 2020, 16, 2001571                                    |
| Co <sub>3</sub> O <sub>4</sub> /rGO                            | 290                                             | 1M KOH        | CF        | Chem. Eur. J., 2017, 23,<br>4010                            |
| Co@Co <sub>3</sub> O <sub>4</sub>                              | 333                                             | 1M KOH        | GC        | ACS Catal., 2018, 8, 7879                                   |
| Co <sub>3</sub> O <sub>4</sub> @CMC                            | 290                                             | 1M KOH        | GC        | Electrochim. Acta, 2021,<br>398, 139338                     |
